# Supplementary material for: Nuclear Glycoprotein A Repetitions Predominant (GARP) Is a Common Trait of Glioblastoma Stem-like Cells and Correlates with Poor Survival in Glioblastoma Patients
Source: MDPI journal article supplement (doi:10.3390/cancers15245711), 2023-12-05
Supplement: s1 [file s1]

## Original Images for Blots (Figure 5)

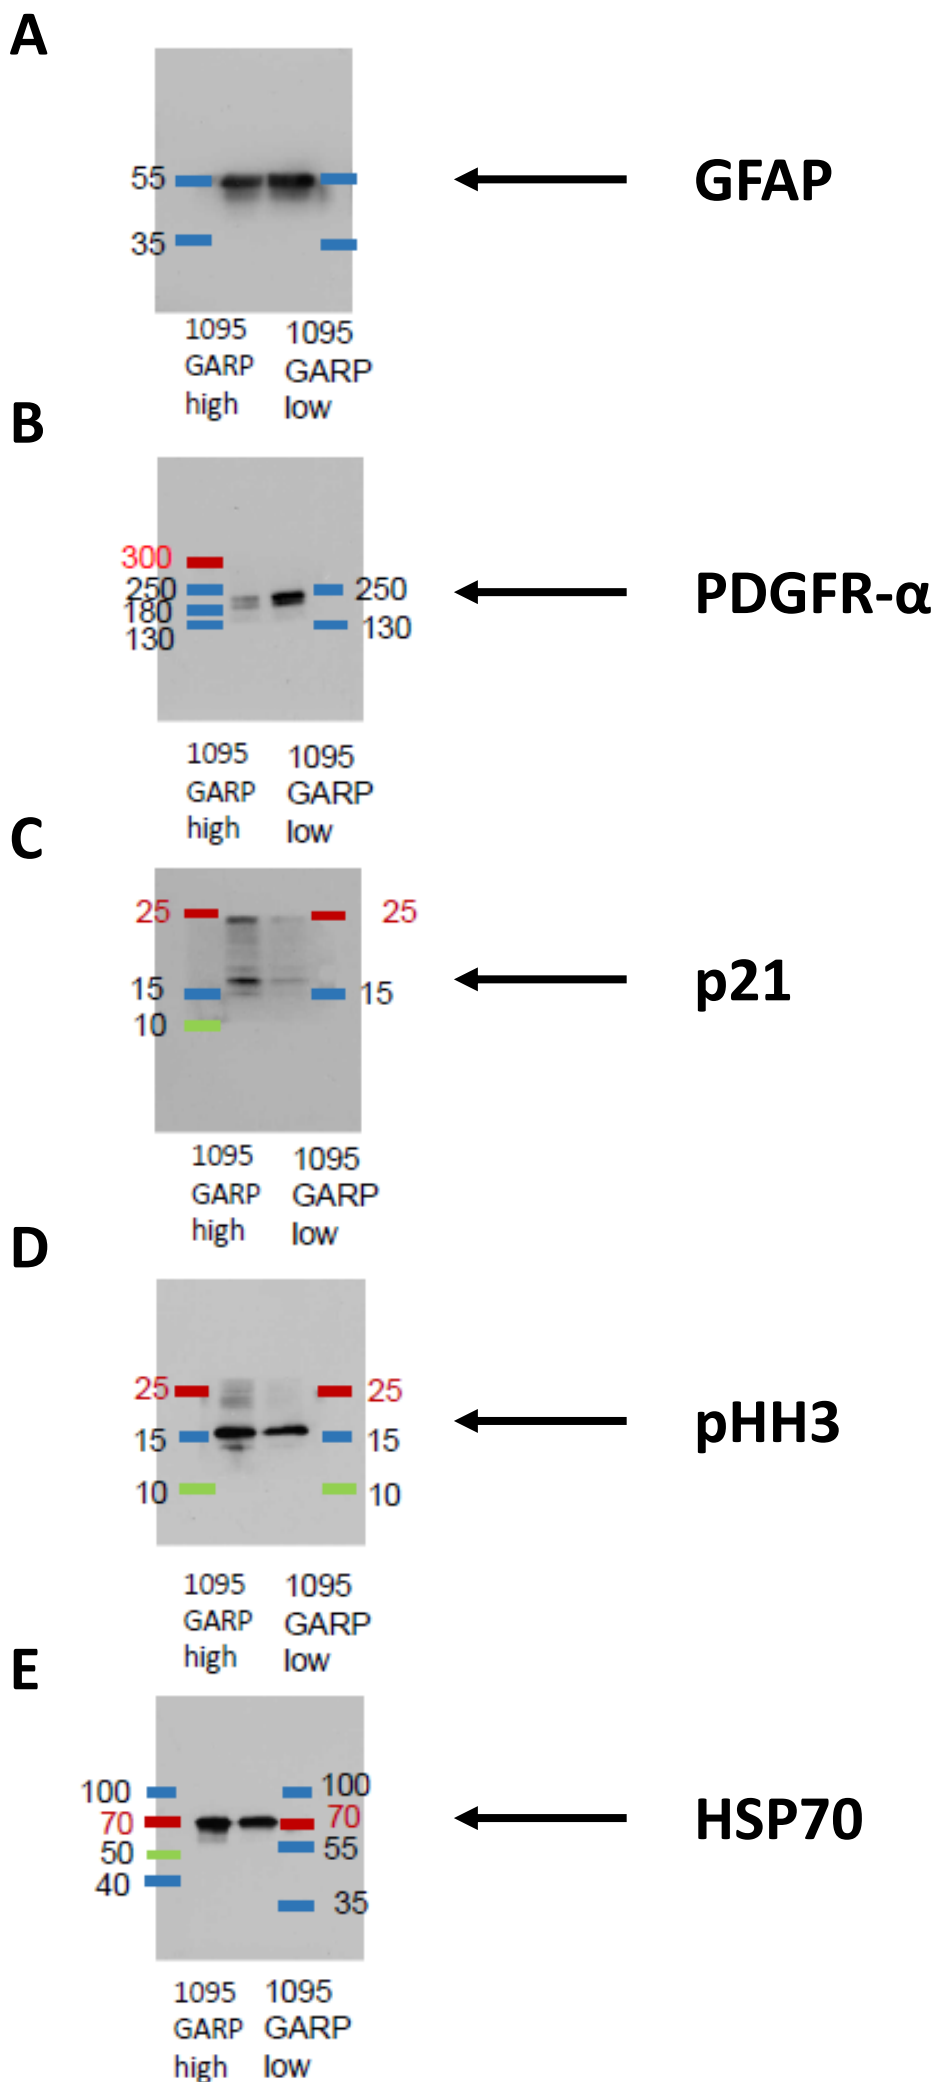

**Original Images for Blots (Figure 5):** Original, uncropped, and unadjusted blot images shown in Figure 5. The following proteins were analyzed: (A) glial fibrillary acidic protein (GFAP), (B) platelet-derived growth factor receptor alpha (PDGFR- $\alpha$ ), (C) p21, (D) phosphorylated histone H3 (PHH3), and (E) HSP70 was used as a loading control. Protein size (kDa) is indicated by the ladders on the left and right sides of the membranes.
